# Supplementary material for: Reconfigurable Dual Peptide Tethered Polymer System Offers a Synergistic Solution for Next Generation Dental Adhesives
Source: MDPI journal article supplement (doi:10.3390/ijms22126552), 2021-06-18
Supplement: s1 [file s1]

# Reconfigurable Dual Peptide Tethered Polymer System Offers a Synergistic Solution for Next Generation Dental Adhesives

*Esra Yuca<sup>1</sup>, Sheng-Xue Xie<sup>2</sup>, Linyong Song<sup>3</sup>, Kyle Boone<sup>4</sup>, Sarah K. Woolfolk<sup>5</sup>, Nilan J.B. Kamathewatta<sup>6</sup>, Philip Elrod<sup>7</sup>, Paulette Spencer<sup>8</sup>, and Candan Tamerler<sup>9</sup>, \**

<sup>1</sup> IBER Institute for Bioengineering Research, University of Kansas (KU), 1530 W. 15th St, Lawrence, KS 66045, USA; Department of Molecular Biology and Genetics, Yildiz Technical University, Istanbul, 34210, eyuca@yildiz.edu.tr

<sup>2</sup> IBER Institute for Bioengineering Research, University of Kansas (KU), 1530 W. 15th St, Lawrence, KS 66045, USA; sxie@ku.edu

<sup>3</sup> IBER Institute for Bioengineering Research, University of Kansas (KU), 1530 W. 15th St, Lawrence, KS 66045, USA; leonsong@ku.edu

<sup>4</sup> IBER Institute for Bioengineering Research, University of Kansas (KU), 1530 W. 15th St, Lawrence, KS 66045, USA; k097b443@ku.edu

<sup>5</sup> IBER Institute for Bioengineering Research, Bioengineering Program, University of Kansas (KU), 1530 W. 15th St, Lawrence, KS 66045, USA; sarah.vanoosten@ku.edu

<sup>6</sup> IBER Institute for Bioengineering Research, University of Kansas (KU), 1530 W. 15th St, Lawrence, KS 66045, USA; nilan\_jayabahu@ku.edu

<sup>7</sup> Bioengineering Program, University of Kansas (KU), 1530 W. 15th St, Lawrence, KS 66045; philip.m.elrod@ku.edu

<sup>8</sup> IBER Institute for Bioengineering Research, Department of Mechanical Engineering, Bioengineering Program, University of Kansas (KU), 1530 W. 15th St, Lawrence, KS 66045, USA; pspencer@ku.edu

<sup>9</sup> IBER Institute for Bioengineering Research, Department of Mechanical Engineering, Bioengineering Program, University of Kansas (KU), 1530 W. 15th St, Lawrence, KS 66045, USA; ctamerler@ku.edu

\* Correspondence: Candan Tamerler; ctamerler@ku.edu

**Supplemental Table S1.** Molecular weights of peptides synthesized and peptide-monomer conjugates with sequences.

| Peptide Conjugate | Sequence                           | Calculated MW (Da) | Observed MW (Da) |
|-------------------|------------------------------------|--------------------|------------------|
| K-GSGGGK-HABP     | K-GSGGG-CMLPHHGAC                  | 1411.6             | 1411.1           |
| MA-K-GSGGG-HABP   | MA-K-GSGGG-CMLPHHGAC               | 1479.7             | 1479.5           |
| AMPM7             | K-GGG-KWKRWWWWR-NH <sub>2</sub>    | 1816.1             | 1816.0           |
| MA-AMPM7          | MA-K-GGG-KWKRWWWWR-NH <sub>2</sub> | 1884.2             | 1884.1           |

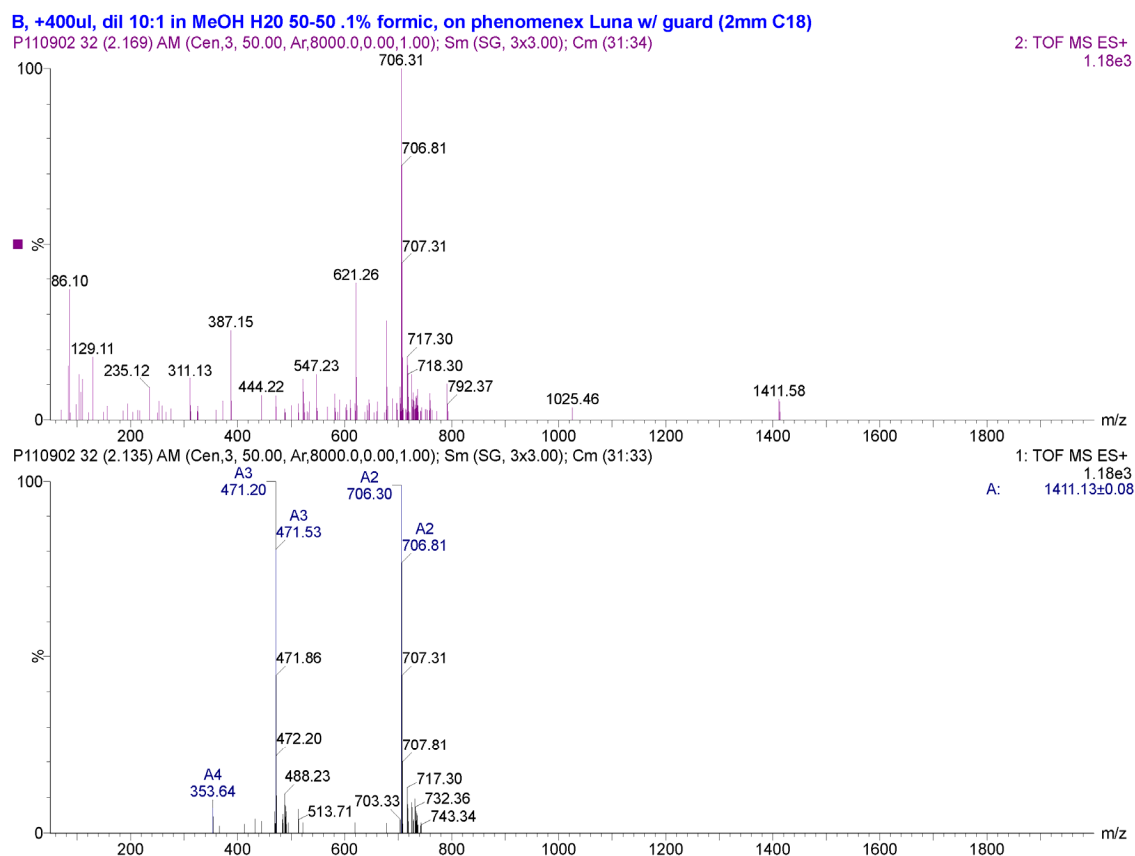

**Supplemental Figure S1.** MALDI-TOF MS results for K-GSGGGK-HABP

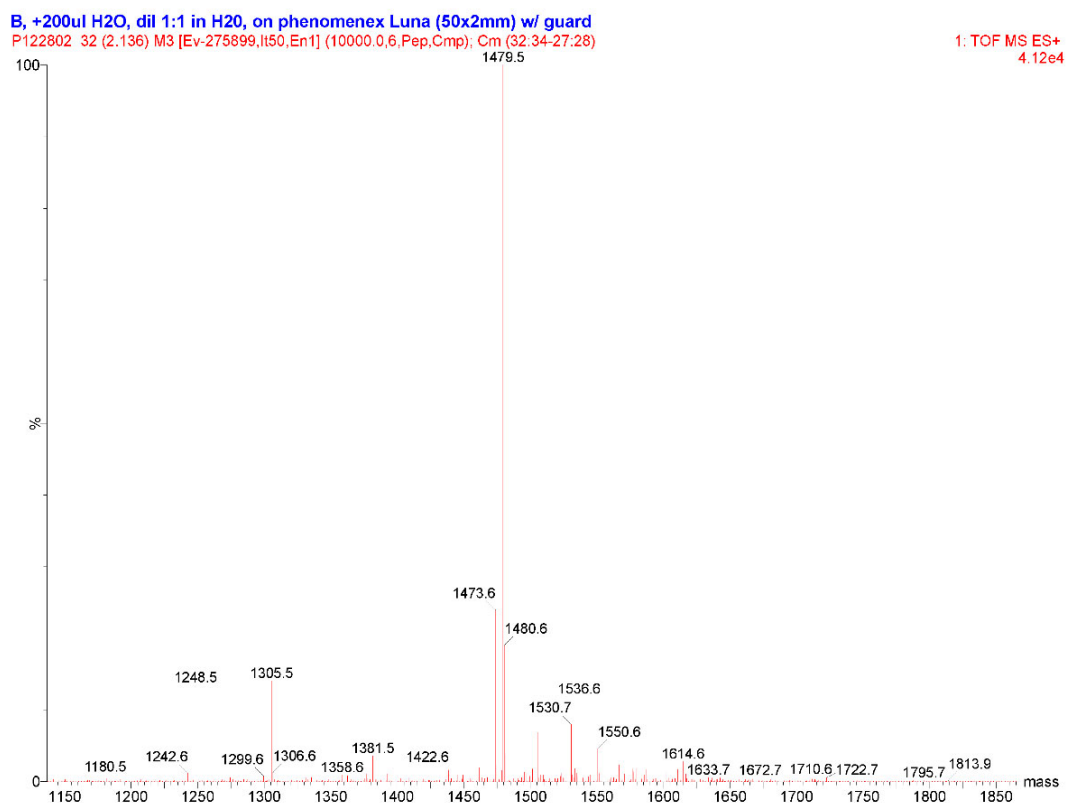

**Supplemental Figure S2. MALDI-TOF MS results for MA-K-GSGGGK-HABP**

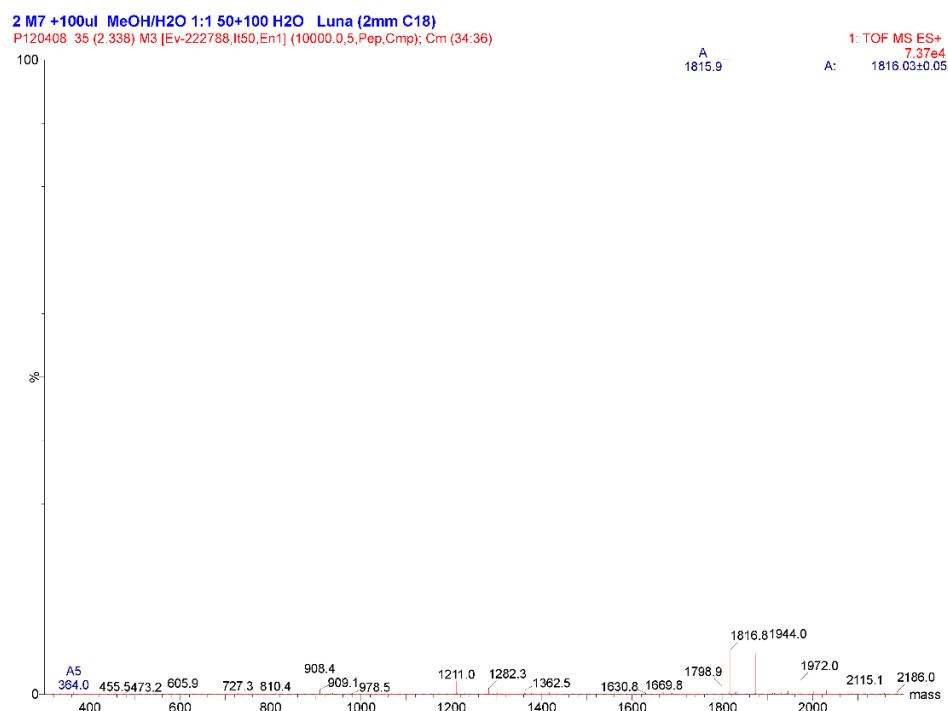

**Supplemental Figure S3. MALDI-TOF MS results for AMPM7**

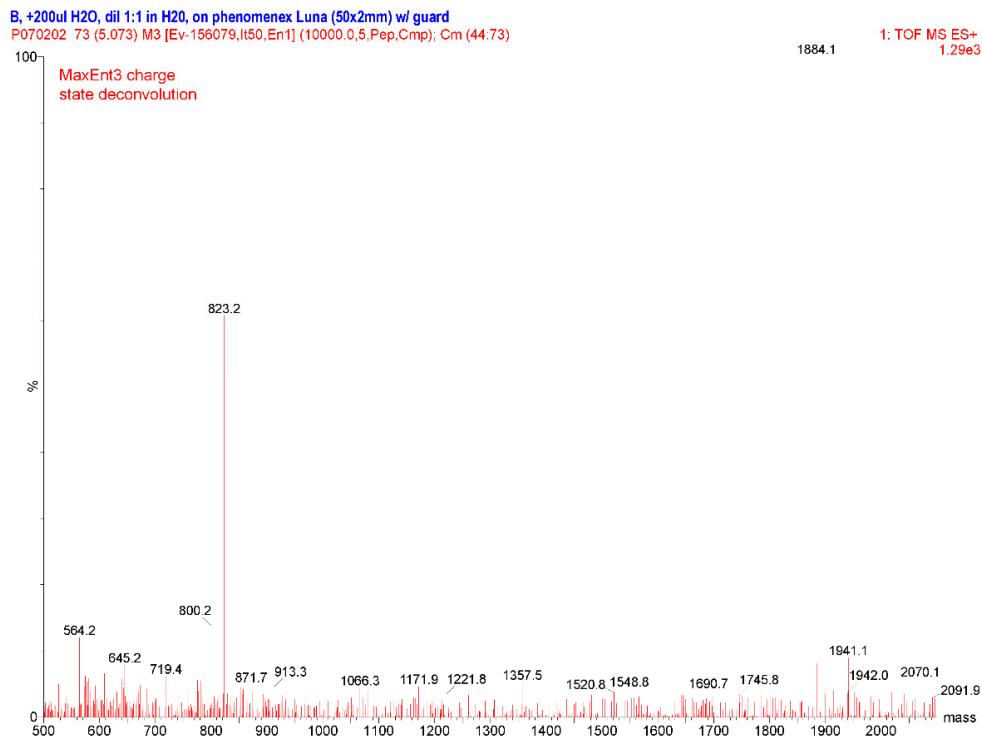

**Supplemental Figure S4.** MALDI-TOF MS results for MA-AMPM7

**Supplemental Table S2.** Minimum inhibitory concentration (MIC) of peptides synthesized and peptide-monomer conjugates against  $10^4$  CFU *S. mutans*.

| Peptide         | Sequence                                     | MIC ( $\mu\text{g/mL}$ ) |
|-----------------|----------------------------------------------|--------------------------|
| AMPM7           | KGGGKWKRWWWR-NH <sub>2</sub>                 | 7.8                      |
| MA-AMPM7        | MA-KGGGKWKRWWWR-NH <sub>2</sub>              | 15.6                     |
| MA-K-GSGGG-HABP | MA-KGSGGGCMLPHHGAC                           | >250                     |
| MA (monomer)    | C <sub>4</sub> H <sub>6</sub> O <sub>2</sub> | >1250                    |

| Sample                                 | MIC (μg/mL) |
|----------------------------------------|-------------|
| Mineral Control                        | >1000       |
| K-GSGGG-HABP integrated mineral        | >1000       |
| AMPM7+ K-GSGGG-HABP integrated mineral | 31.3        |

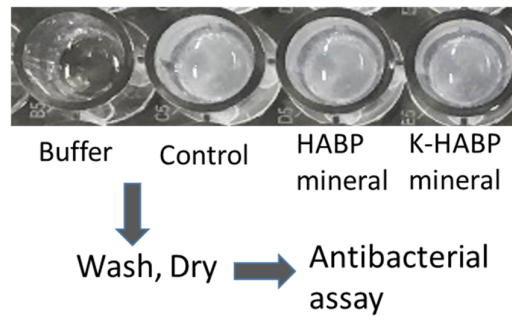

**Supplemental Figure S5:** Activity of dental adhesive components and mineral against *S. mutans* at  $10^4$  CFU/mL
